# Supplementary material for: First Detection of Francisella halioticida Infecting a Wild Population of Blue Mussels Mytilus edulis in the United Kingdom
Source: MDPI journal article supplement (doi:10.3390/pathogens11030329), 2022-03-08
Supplement: s1 [file s1]

Supplement

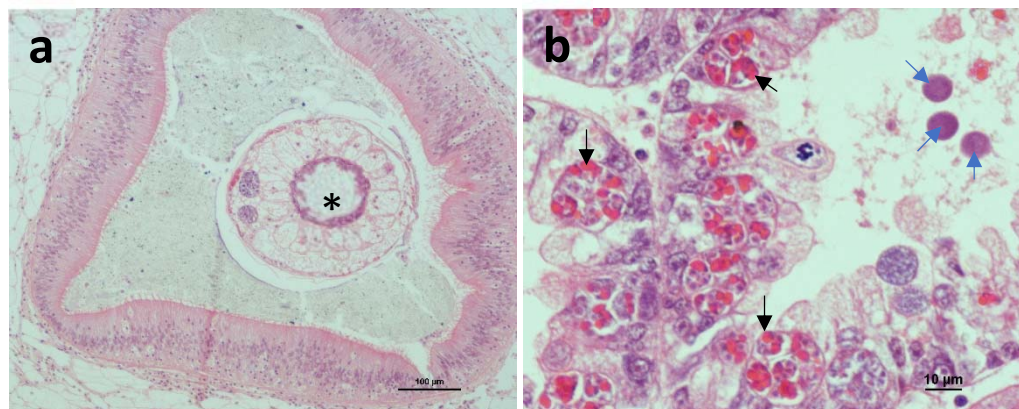

**Figure S1.** Other pathogens identified in the sampled mussels. (a) *Mytilicola*-like sp. (asterisk) in the stomach lumen. (b) Co-infection of *Marteilia pararefringens* and prokaryotic cysts in the digestive tubules. Black arrows: eosinophilic sporocysts; blue arrows: prokaryotic cysts.

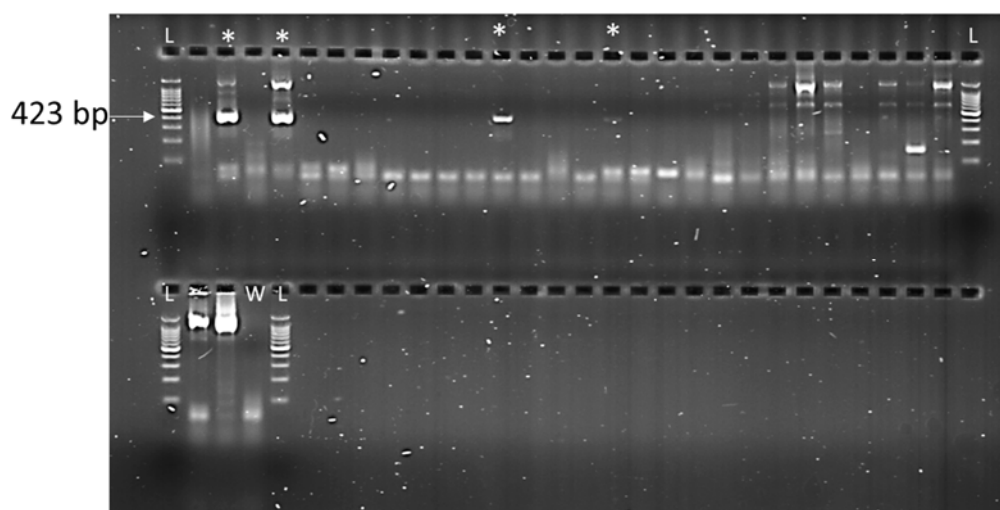

**Figure S2.** Nested-PCR amplification of a fragment of 423 bp of the 16S rRNA gene of *Francisella halitotida* in *Mytilus edulis* using the set of primers FD1/rP2 (Weisburg et al., 1991) for the first round of PCR; and Megai-60/Megai-480r (Kamaishi et al., 2010) for the second round of PCR. The agarose gel shows the amplified fragment of 423 bp in positive samples (asterisks). Water was used as negative control (W). 650 ng of a 100 bp DNA ladder (Promega) was used as a molecular weight marker (L).

**Supplement Table S1.** Percentage of nucleotide identity of the 16S rRNA gene of *Francisella haliotica* infecting blue mussels (this study) with published sequences of *F. haliotica* and close relatives within the Francisella taxa.

|    |                                    | 1     | 2     | 3     | 4     | 5     | 6     | 7     | 8     | 9     | 10    | 11    | 12    | 13    | 14    | 15    | 16    |
|----|------------------------------------|-------|-------|-------|-------|-------|-------|-------|-------|-------|-------|-------|-------|-------|-------|-------|-------|
| 1  | <i>F. salina</i> _NC015696         |       |       |       |       |       |       |       |       |       |       |       |       |       |       |       |       |
| 2  | <i>F. noatunensis</i> _DQ309246    | 98.72 |       |       |       |       |       |       |       |       |       |       |       |       |       |       |       |
| 3  | <i>F. endociliophora</i> _CP009574 | 99.64 | 98.65 |       |       |       |       |       |       |       |       |       |       |       |       |       |       |
| 4  | <i>F. uliginis</i> _CP016796       | 98.58 | 97.79 | 98.65 |       |       |       |       |       |       |       |       |       |       |       |       |       |
| 5  | <i>F. tularensis</i> _Z21931       | 96.79 | 97.36 | 96.87 | 96.15 |       |       |       |       |       |       |       |       |       |       |       |       |
| 6  | <i>F. persica</i> _CP012505        | 97.29 | 97.44 | 97.22 | 96.58 | 97.93 |       |       |       |       |       |       |       |       |       |       |       |
| 7  | <i>F. hispaniensis</i> _NC017449   | 97.22 | 97.86 | 97.15 | 96.44 | 99.00 | 98.58 |       |       |       |       |       |       |       |       |       |       |
| 8  | <i>F. philomiragia</i> _CP010019   | 98.58 | 99.43 | 98.50 | 97.65 | 97.79 | 97.65 | 98.43 |       |       |       |       |       |       |       |       |       |
| 9  | <i>F. haliotica</i> _NR112804      | 98.72 | 97.86 | 98.79 | 98.01 | 96.15 | 96.72 | 96.44 | 97.93 |       |       |       |       |       |       |       |       |
| 10 | <i>F. haliotica</i> _AB449247      | 98.72 | 97.86 | 98.79 | 98.01 | 96.15 | 96.72 | 96.44 | 97.93 | 100   |       |       |       |       |       |       |       |
| 11 | <i>F. haliotica</i> _NR118116      | 98.79 | 97.93 | 98.86 | 98.08 | 96.23 | 96.79 | 96.51 | 98.01 | 99.93 | 99.93 |       |       |       |       |       |       |
| 12 | <i>F. haliotica</i> _JF290369      | 98.79 | 97.93 | 98.86 | 98.08 | 96.23 | 96.79 | 96.51 | 98.01 | 99.93 | 99.93 | 100   |       |       |       |       |       |
| 13 | <i>F. haliotica</i> _AP023082      | 98.79 | 97.93 | 98.86 | 98.08 | 96.23 | 96.79 | 96.51 | 98.01 | 99.93 | 99.93 | 100   | 100   |       |       |       |       |
| 14 | <i>F. haliotica</i> _CP022132      | 98.79 | 97.93 | 98.86 | 98.08 | 96.23 | 96.79 | 96.51 | 98.01 | 99.93 | 99.93 | 100   | 100   | 100   |       |       |       |
| 15 | <i>F. haliotica</i> _S26*          | 98.79 | 97.93 | 98.86 | 98.08 | 96.23 | 96.79 | 96.51 | 98.01 | 99.93 | 99.93 | 100   | 100   | 100   | 100   |       |       |
| 16 | <i>F. haliotica</i> _S134*         | 98.72 | 97.86 | 98.79 | 98.01 | 96.15 | 96.72 | 96.44 | 97.93 | 99.86 | 99.86 | 99.93 | 99.93 | 99.93 | 99.93 | 99.93 |       |
| 17 | <i>F. haliotica</i> _S66*          | 98.79 | 97.93 | 98.86 | 98.08 | 96.23 | 96.79 | 96.51 | 98.01 | 99.93 | 99.93 | 100   | 100   | 100   | 100   | 100   | 99.93 |
